# Supplementary material for: A Sulfonic Acid Polyvinyl Pyridinium Ionic Liquid Catalyzes the Multi-Component Synthesis of Spiro-indoline-3,5′-pyrano[2,3-d]-pyrimidines and -Pyrazines
Source: MDPI journal article supplement (doi:10.3390/molecules28093663), 2023-04-23
Supplement: s1 [file s1]

## Supplementary Material for

### A sulfonic acid polyvinyl pyridinium ionic liquid catalyzes the multi-component synthesis of spiro-indoline-3,5'-pyrano[2,3-*d*]-pyrimidines and -pyrazines

Mehdi Khalaj<sup>1,\*</sup> Mahboubeh Taherkhani<sup>2</sup>, Leo Payen<sup>3</sup>, and Axel Klein<sup>\*,3</sup>,

<sup>1</sup> Department of Chemistry, Buinzahra Branch, Islamic Azad University, Buinzahra, Iran;

<sup>2</sup> Department of Chemistry, Takestan Branch, Islamic Azad University, Takestan, Iran, Email: mahtaherkhani@yahoo.com, ORCID: [0000-0002-4539-5937](https://orcid.org/0000-0002-4539-5937) (M.T.)

<sup>3</sup> University of Cologne, Faculty of Mathematics and Natural Sciences, Department of Chemistry, Institute for Inorganic Chemistry, Greinstrasse 6, 50939 Köln, Germany. Email: lpayen@smail.uni-koeln.de, ORCID: [0000-0003-1291-9690](https://orcid.org/0000-0003-1291-9690) (L.P.)

\* Correspondence: E-mail: khalaj\_mehdi@yahoo.com (M.K.), ORCID: [0000-0002-5327-9266](https://orcid.org/0000-0002-5327-9266); Email: [axel.klein@uni-koeln.de](mailto:axel.klein@uni-koeln.de), ORCID: [0000-0003-0093-9619](https://orcid.org/0000-0003-0093-9619) (A.K.).

#### Contents:

**Figure S1.** <sup>1</sup>H NMR spectrum of **1c** in DMSO-*d*<sub>6</sub>.

**Figure S2.** <sup>13</sup>C NMR spectrum of **1c** in DMSO-*d*<sub>6</sub>.

**Figure S3.** <sup>1</sup>H NMR spectrum of **2c** in DMSO-*d*<sub>6</sub>.

**Figure S4.** <sup>13</sup>C NMR spectrum of **2c** in DMSO-*d*<sub>6</sub>.

**Figure S5.** <sup>1</sup>H NMR spectrum of **3c** in DMSO-*d*<sub>6</sub>.

**Figure S6.** <sup>13</sup>C NMR spectrum of **3c** in DMSO-*d*<sub>6</sub>.

**Figure S7.** <sup>1</sup>H NMR spectrum of **4c** in DMSO-*d*<sub>6</sub>.

**Figure S8.** <sup>13</sup>C NMR spectrum of **4c** in DMSO-*d*<sub>6</sub>.

**Figure S9.** <sup>1</sup>H NMR spectrum of **5c** in DMSO-*d*<sub>6</sub>.

**Figure S10.** <sup>13</sup>C NMR spectrum of **5c** in DMSO-*d*<sub>6</sub>.

**Figure S11.** <sup>1</sup>H NMR spectrum of **6c** in DMSO-*d*<sub>6</sub>.

**Figure S12.** <sup>13</sup>C NMR spectrum of **6c** in DMSO-*d*<sub>6</sub>.

**Figure S13.** <sup>1</sup>H NMR spectrum of **1d** in DMSO-*d*<sub>6</sub>.

**Figure S14.** <sup>13</sup>C NMR spectrum of **1d** in DMSO-*d*<sub>6</sub>.

**Figure S15.** <sup>1</sup>H NMR spectrum of **2d** in DMSO-*d*<sub>6</sub>.

**Figure S16.** <sup>13</sup>C NMR spectrum of **2d** in DMSO-*d*<sub>6</sub>.

**Figure S17.** <sup>1</sup>H NMR spectrum of **3d** in DMSO-*d*<sub>6</sub>.

**Figure S18.** <sup>13</sup>C NMR spectrum of **3d** in DMSO-*d*<sub>6</sub>.

**Figure S19.** <sup>1</sup>H NMR spectrum of **4d** in DMSO-*d*<sub>6</sub>.

**Figure S20.** <sup>13</sup>C NMR spectrum of **4d** in DMSO-*d*<sub>6</sub>.

**Figure S21.** <sup>1</sup>H NMR spectrum of **5d** in DMSO-*d*<sub>6</sub>.

**Figure S22.** <sup>13</sup>C NMR spectrum of **5d** in DMSO-*d*<sub>6</sub>.

**Figure S23.** <sup>1</sup>H NMR spectrum of **6d** in DMSO-*d*<sub>6</sub>.

**Figure S24.** <sup>13</sup>C NMR spectrum of **6d** in DMSO-*d*<sub>6</sub>.

**Figure S25.** <sup>1</sup>H NMR spectrum of **7d** in DMSO-*d*<sub>6</sub>.

**Figure S26.** <sup>13</sup>C NMR spectrum of **7d** in DMSO-*d*<sub>6</sub>.

**Figure S27.** <sup>1</sup>H NMR spectrum of **8d** in DMSO-*d*<sub>6</sub>.

**Figure S28.** <sup>13</sup>C NMR spectrum of **8d** in DMSO-*d*<sub>6</sub>.

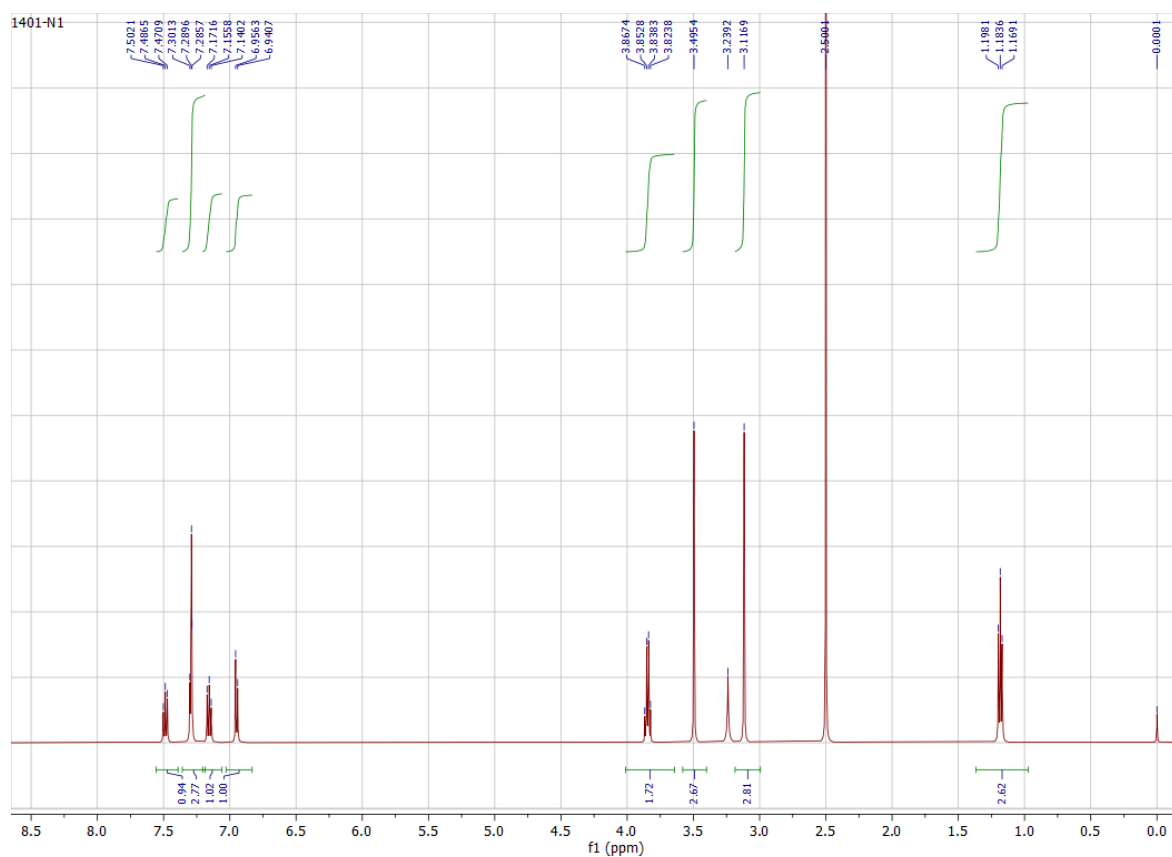

**Figure S1.** <sup>1</sup>H NMR spectrum of 7'-amino-1-ethyl-1',3'-dimethyl-2,2',4'-trioxo-1',2',3',4'-tetrahydrospiro[indoline-3,5'-pyrano[2,3-*d*]pyrimidine]-6'-carbonitrile (**1c**) in DMSO-d<sub>6</sub>.

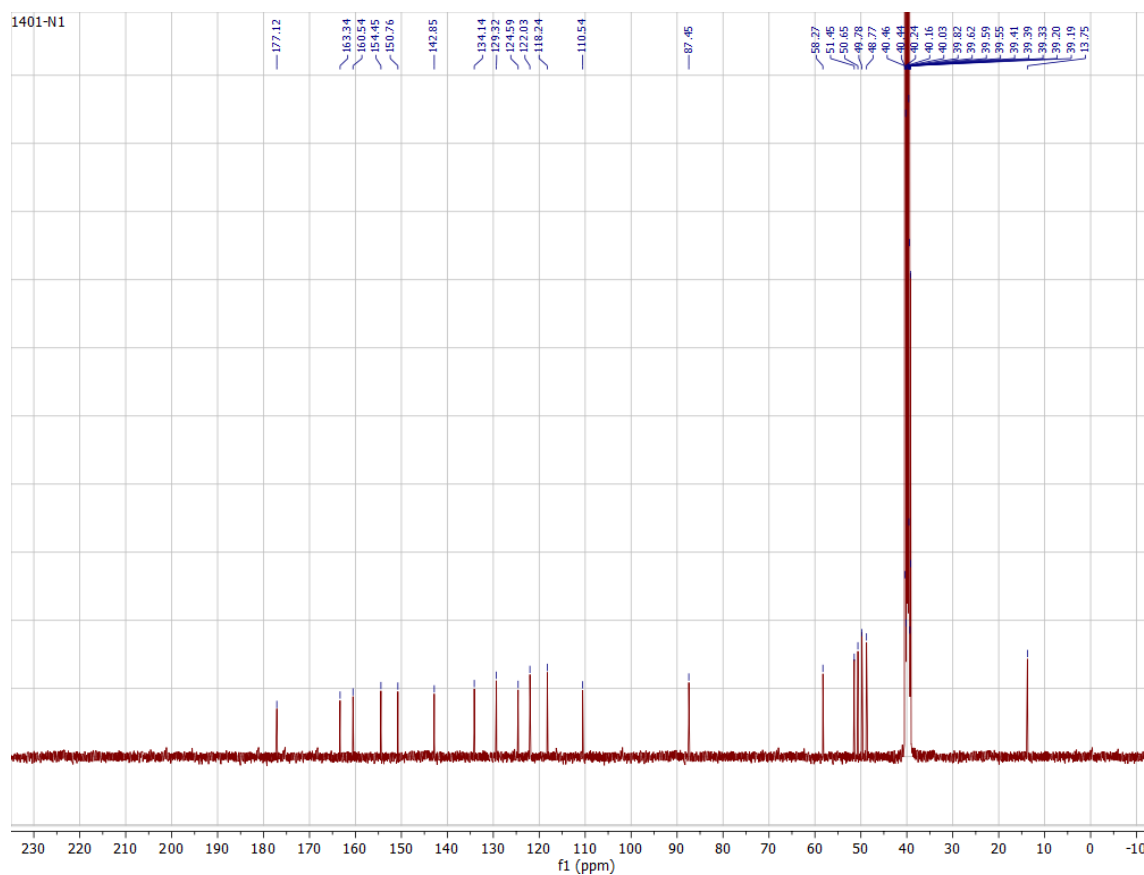

**Figure S2.** <sup>13</sup>C NMR spectrum of 7'-amino-1-ethyl-1',3'-dimethyl-2,2',4'-trioxo-1',2',3',4'-tetrahydrospiro[indoline-3,5'-pyrano[2,3-*d*]pyrimidine]-6'-carbonitrile (**1c**) in DMSO-d<sub>6</sub>.

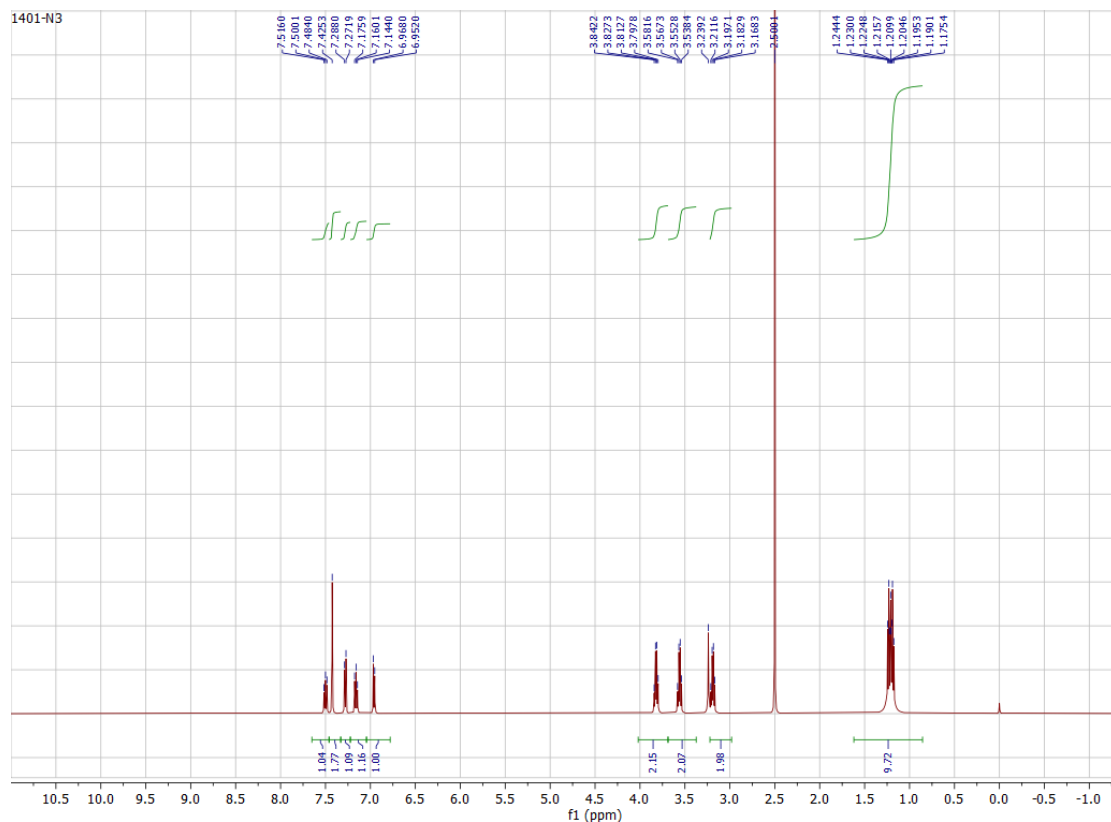

**Figure S3.**  $^1\text{H}$  NMR spectrum of 7'-amino-1,1',3'-triethyl-2,2',4'-trioxo-1',2',3',4'-tetrahydrospiro[indoline-3,5'-pyrano[2,3-*d*]pyrimidine]-6'-carbonitrile (**2c**) in  $\text{DMSO-}d_6$ .

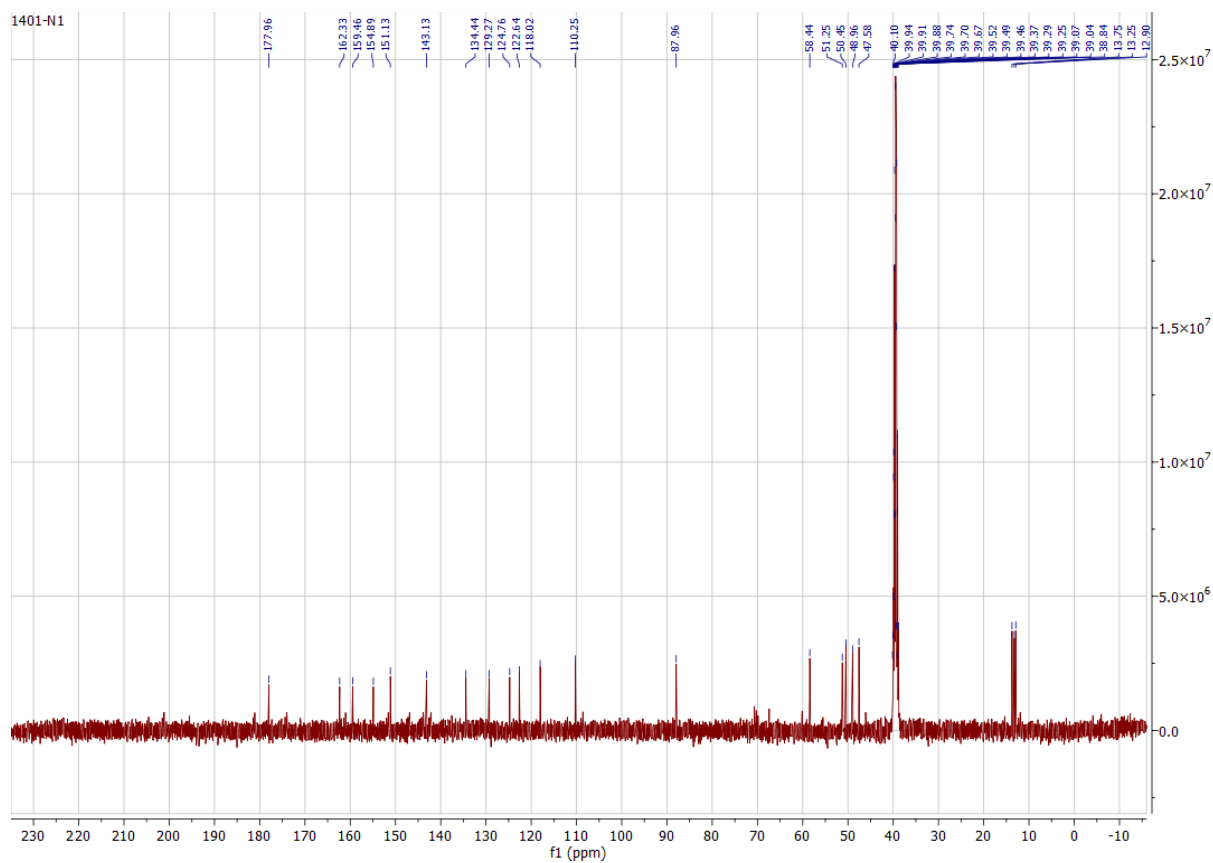

**Figure S4.**  $^{13}\text{C}$  NMR spectrum of 7'-amino-1,1',3'-triethyl-2,2',4'-trioxo-1',2',3',4'-tetrahydrospiro[indoline-3,5'-pyrano[2,3-*d*]pyrimidine]-6'-carbonitrile (**2c**) in  $\text{DMSO-}d_6$ .

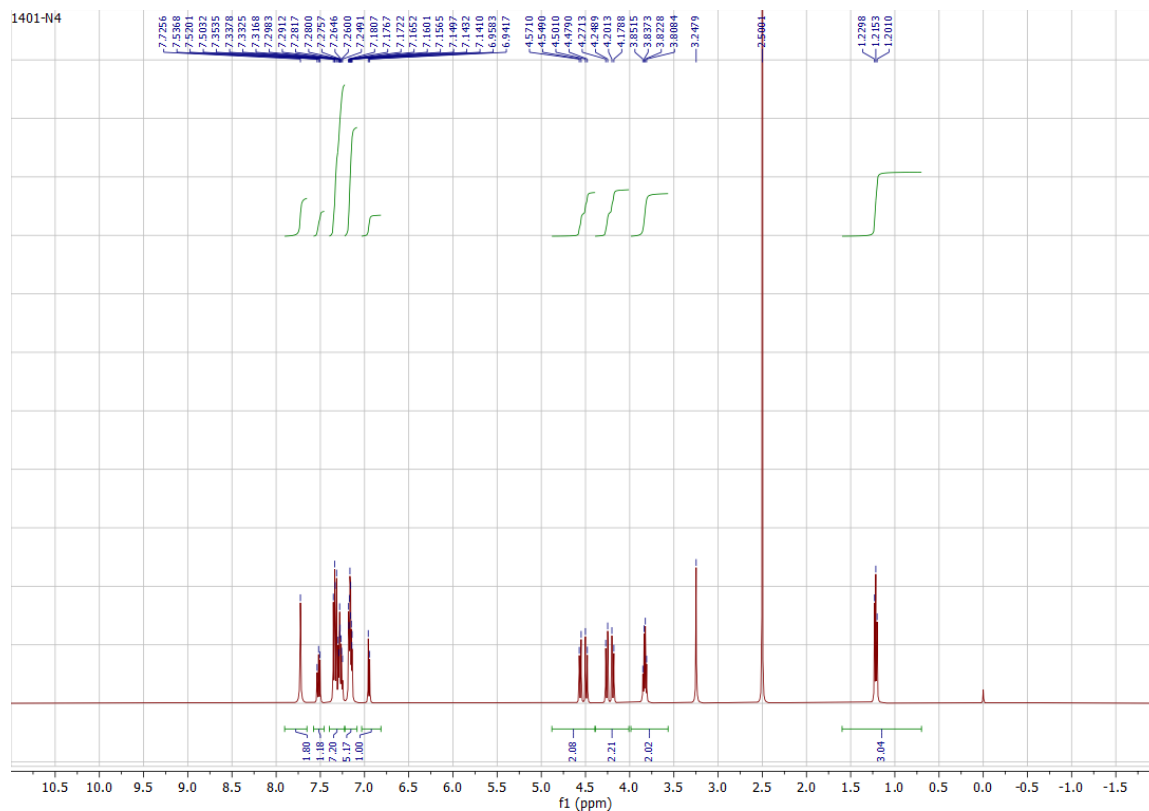

**Figure S5.**  $^1\text{H}$  NMR spectrum of 7'-amino-1',3'-dibenzyl-1-ethyl-2,2',4'-trioxo-1',2',3',4'-tetrahydrospiro[indoline-3,5'-pyrano[2,3-*d*]pyrimidine]-6'-carbonitrile (**3c**) in  $\text{DMSO-}d_6$ .

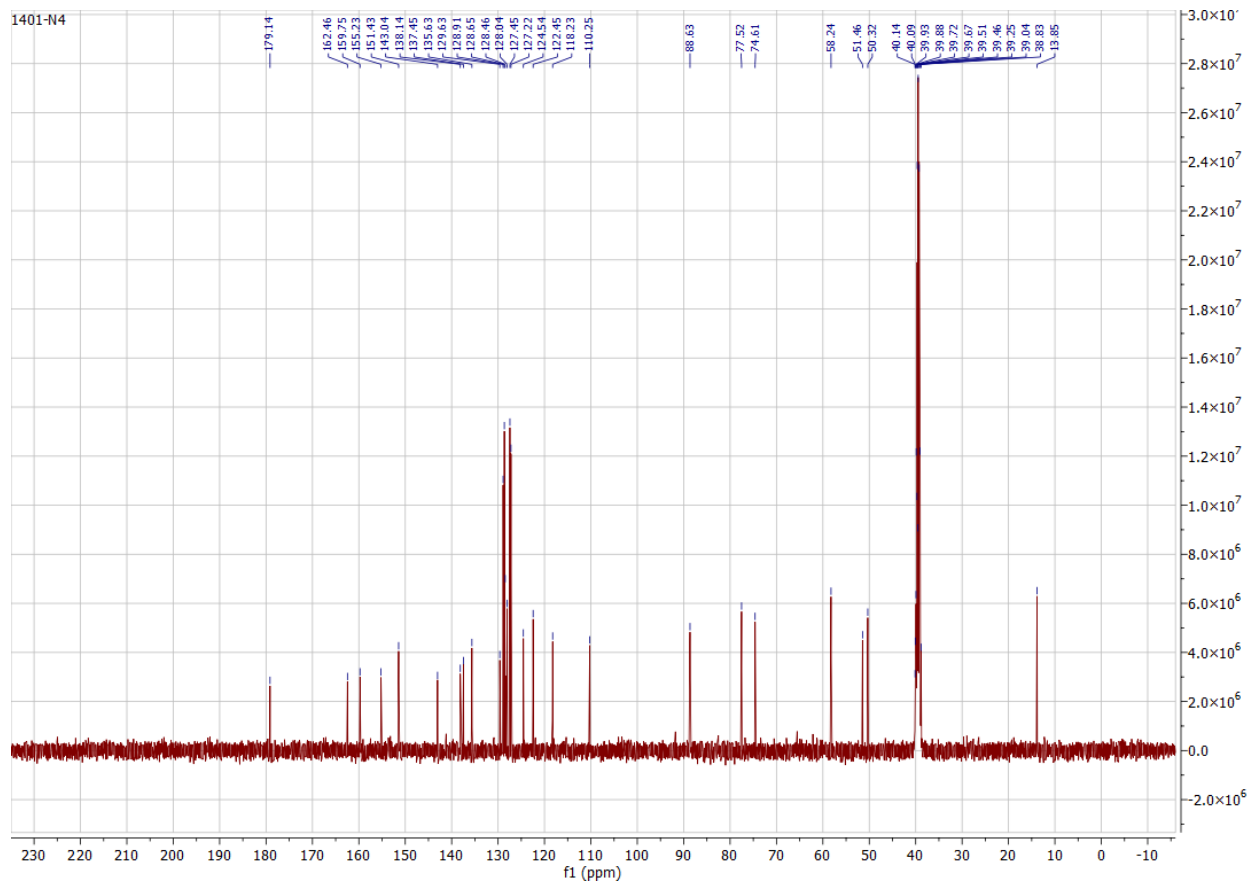

**Figure S6.**  $^{13}\text{C}$  NMR spectrum of 7'-amino-1',3'-dibenzyl-1-ethyl-2,2',4'-trioxo-1',2',3',4'-tetrahydrospiro[indoline-3,5'-pyrano[2,3-*d*]pyrimidine]-6'-carbonitrile (**3c**) in  $\text{DMSO-}d_6$ .

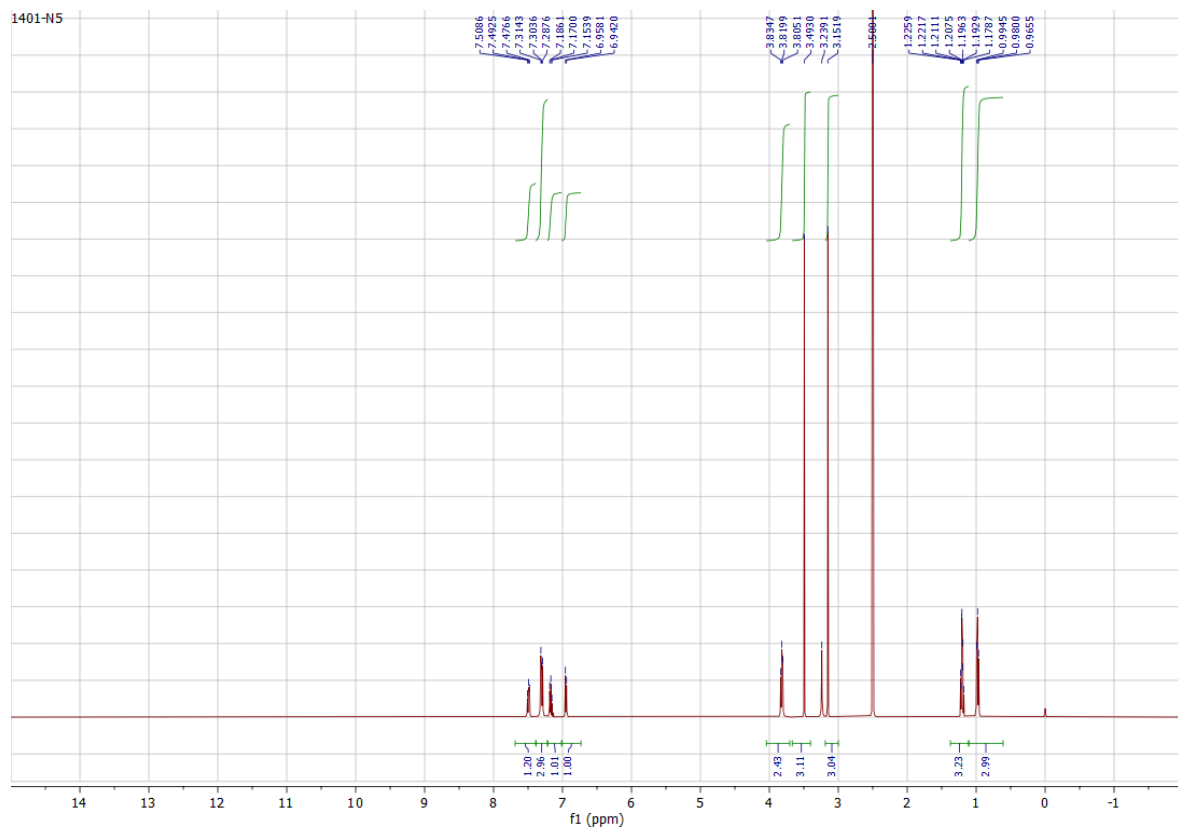

**Figure S7.** <sup>1</sup>H NMR spectrum of 7'-amino-1',3'-dimethyl-2,2',4'-trioxo-1-propyl-1',2',3',4'-tetrahydrospiro[indoline-3,5'-pyrano[2,3-*d*]pyrimidine]-6'-carbonitrile (**4c**) in DMSO-d<sub>6</sub>.

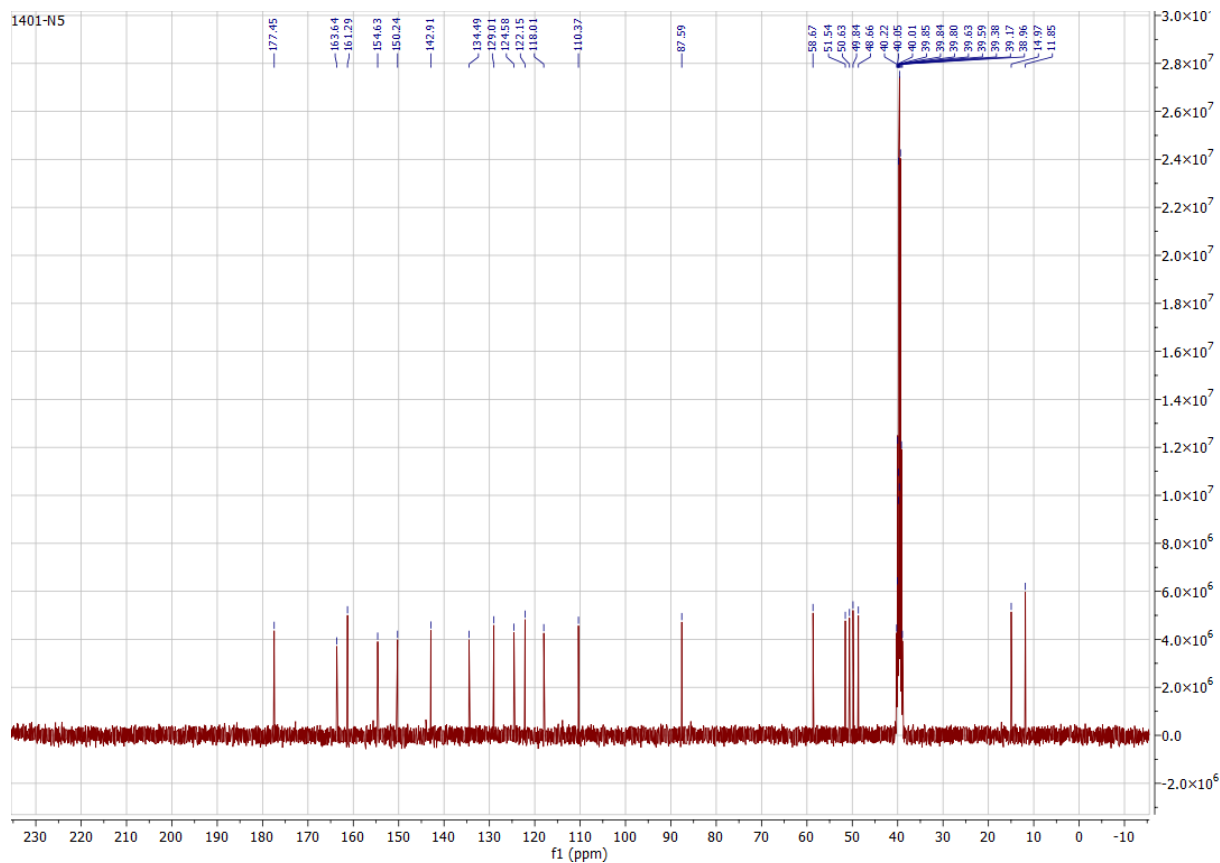

**Figure S8.** <sup>13</sup>C NMR spectrum of 7'-amino-1',3'-dimethyl-2,2',4'-trioxo-1-propyl-1',2',3',4'-tetrahydrospiro[indoline-3,5'-pyrano[2,3-*d*]pyrimidine]-6'-carbonitrile (**4c**) in DMSO-d<sub>6</sub>.

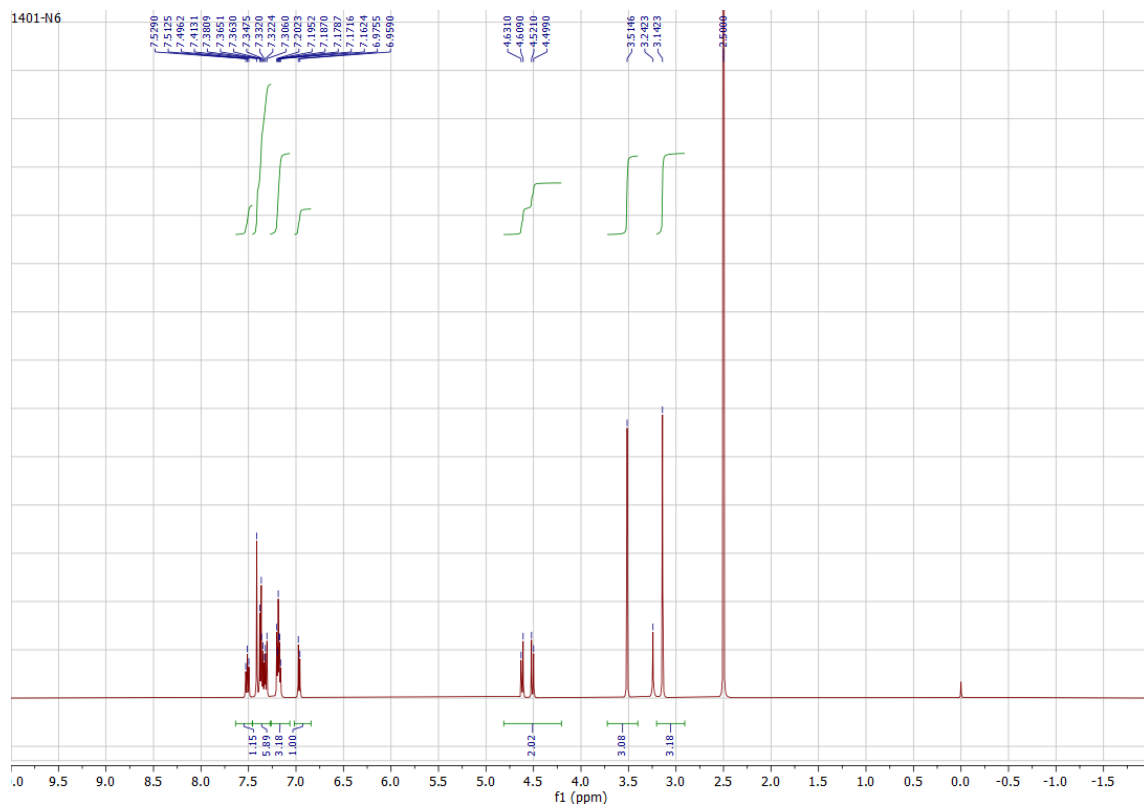

**Figure S9.**  $^1\text{H}$  NMR spectrum of 7'-amino-1-benzyl-1',3'-dimethyl-2,2',4'-trioxo-1',2',3',4'-tetrahydrospiro[indoline-3,5'-pyrano[2,3-*d*]pyrimidine]-6'-carbonitrile (**5c**) in  $\text{DMSO-}d_6$ .

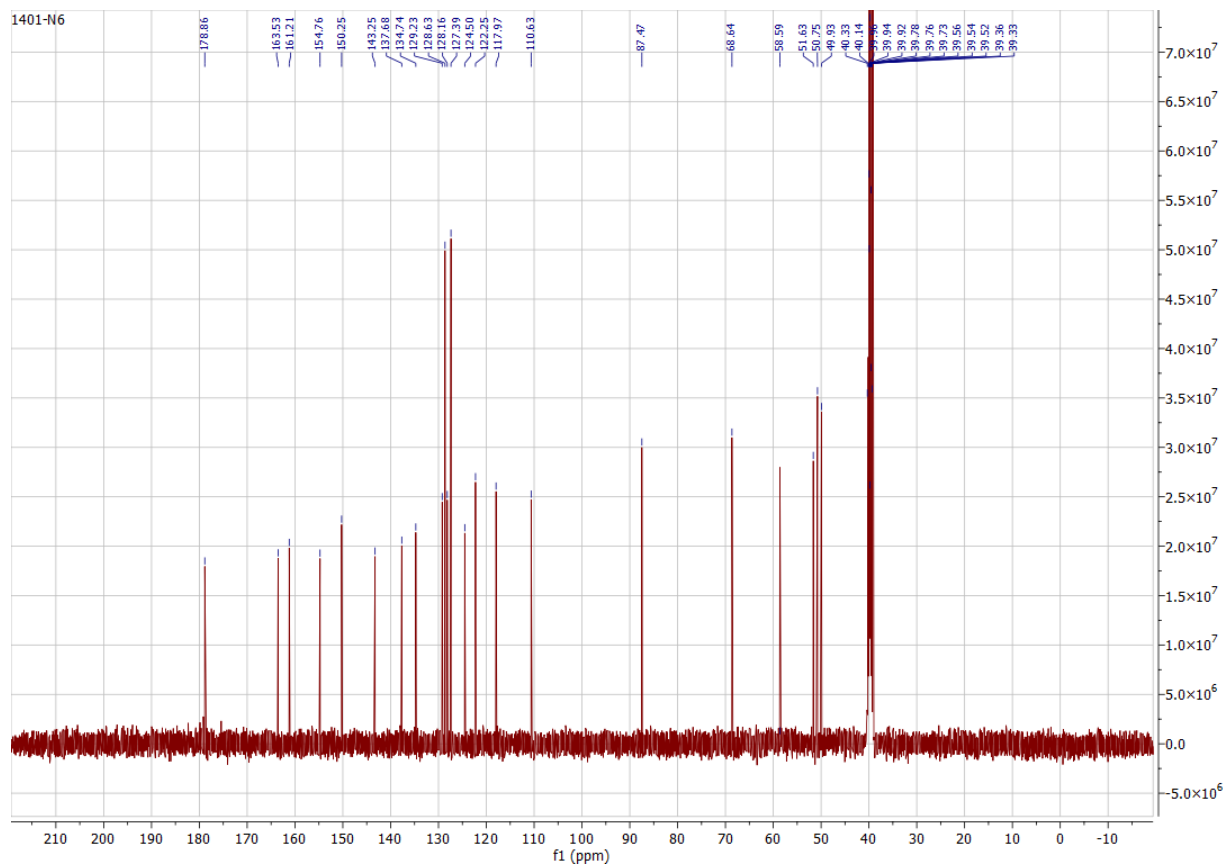

**Figure S10.**  $^{13}\text{C}$  NMR spectrum of 7'-amino-1-benzyl-1',3'-dimethyl-2,2',4'-trioxo-1',2',3',4'-tetrahydrospiro[indoline-3,5'-pyrano[2,3-*d*]pyrimidine]-6'-carbonitrile (**5c**) in  $\text{DMSO-}d_6$ .

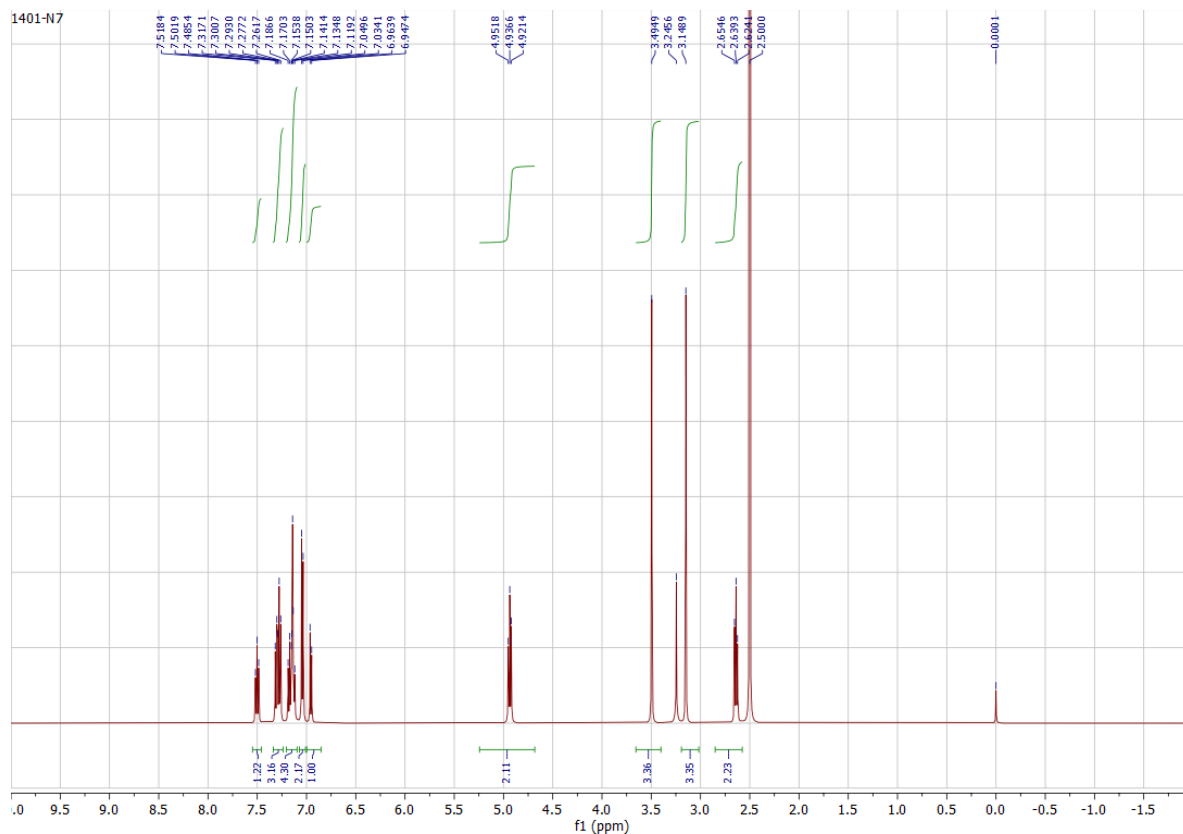

**Figure S11.** <sup>1</sup>H NMR spectrum of 7'-amino-1',3'-dimethyl-2,2',4'-trioxo-1-phenethyl-1',2',3',4'-tetrahydrospiro[indoline-3,5'-pyrano[2,3-*d*]pyrimidine]-6'-carbonitrile (**6c**) in DMSO-*d*<sub>6</sub>.

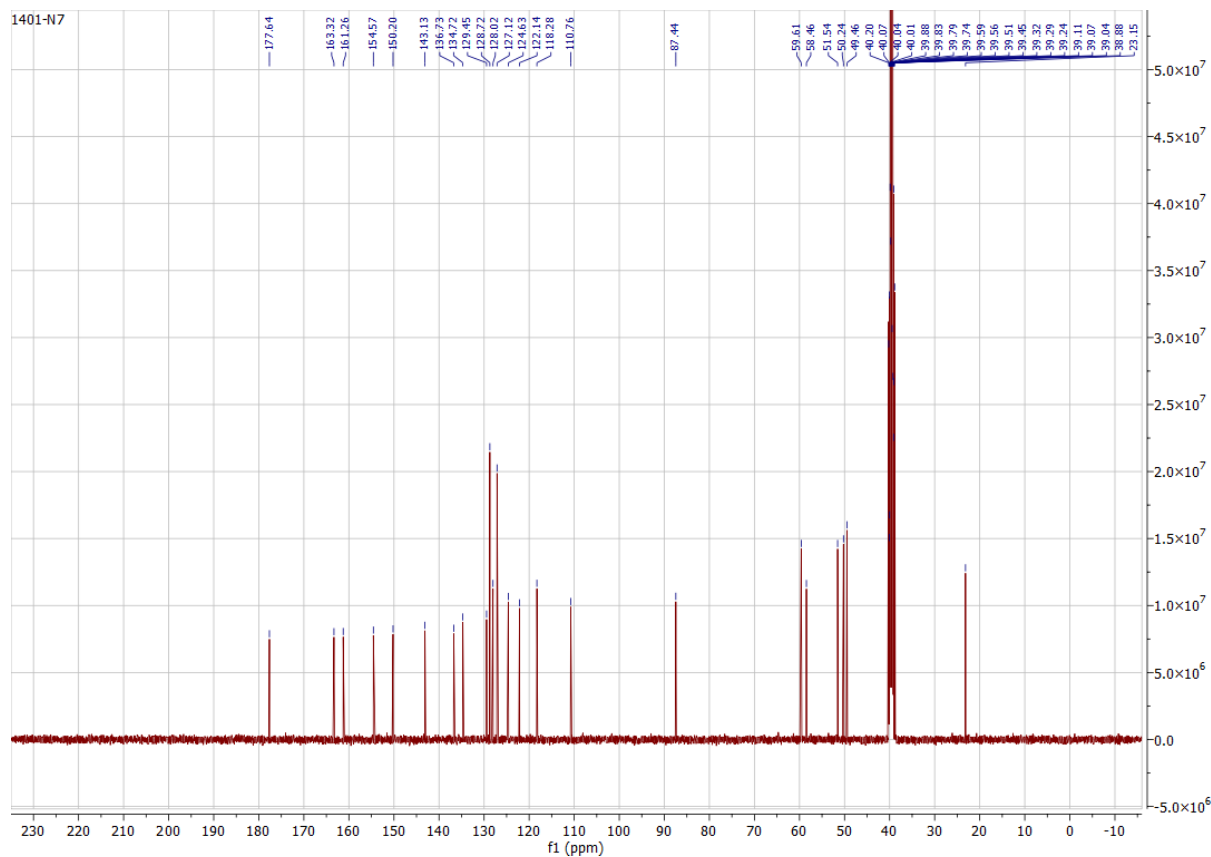

**Figure S12.** <sup>13</sup>C NMR spectrum of 7'-amino-1',3'-dimethyl-2,2',4'-trioxo-1-phenethyl-1',2',3',4'-tetrahydrospiro[indoline-3,5'-pyrano[2,3-*d*]pyrimidine]-6'-carbonitrile (**6c**) in DMSO-*d*<sub>6</sub>.

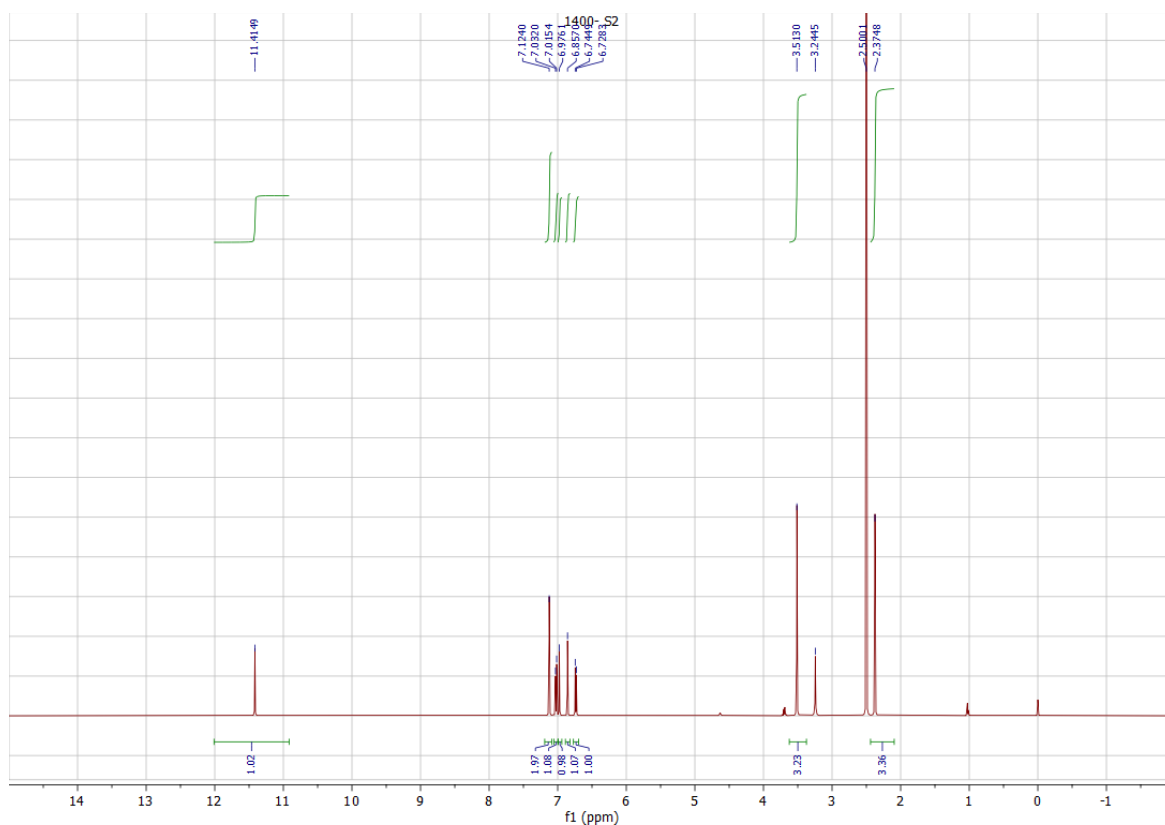

**Figure S13.** <sup>1</sup>H NMR spectrum of methyl 6'-amino-5'-cyano-5-methyl-2-oxo-2'H-spiro[indoline-3,4'-pyrano[2,3-*c*]pyrazole]-3'-carboxylate (**1d**) in DMSO-*d*<sub>6</sub>.

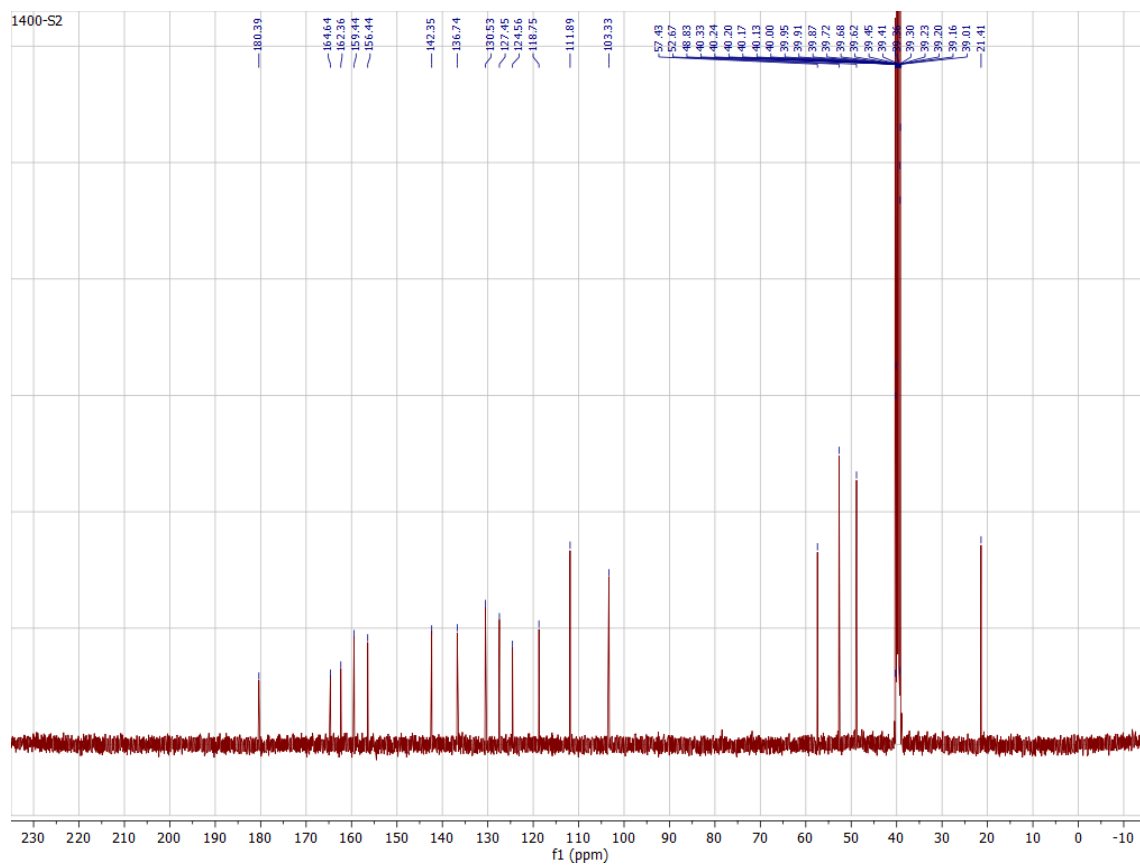

**Figure S14.** <sup>13</sup>C NMR spectrum of methyl 6'-amino-5'-cyano-5-methyl-2-oxo-2'H-spiro[indoline-3,4'-pyrano[2,3-*c*]pyrazole]-3'-carboxylate (**1d**) in DMSO-*d*<sub>6</sub>.



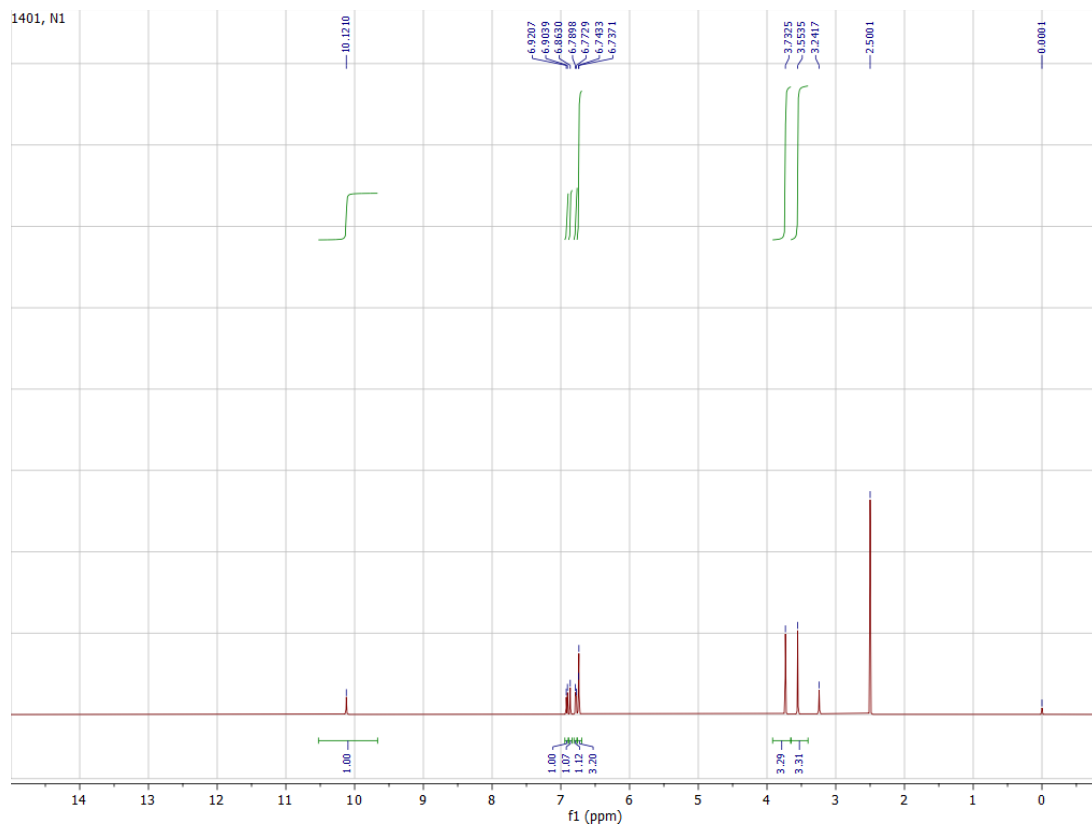

**Figure S15.** <sup>1</sup>H NMR spectrum of methyl 6'-amino-5'-cyano-5-methoxy-2-oxo-2'H-spiro[indoline-3,4'-pyrano[2,3-c]pyrazole]-3'-carboxylate (**2d**) in DMSO-d<sub>6</sub>.

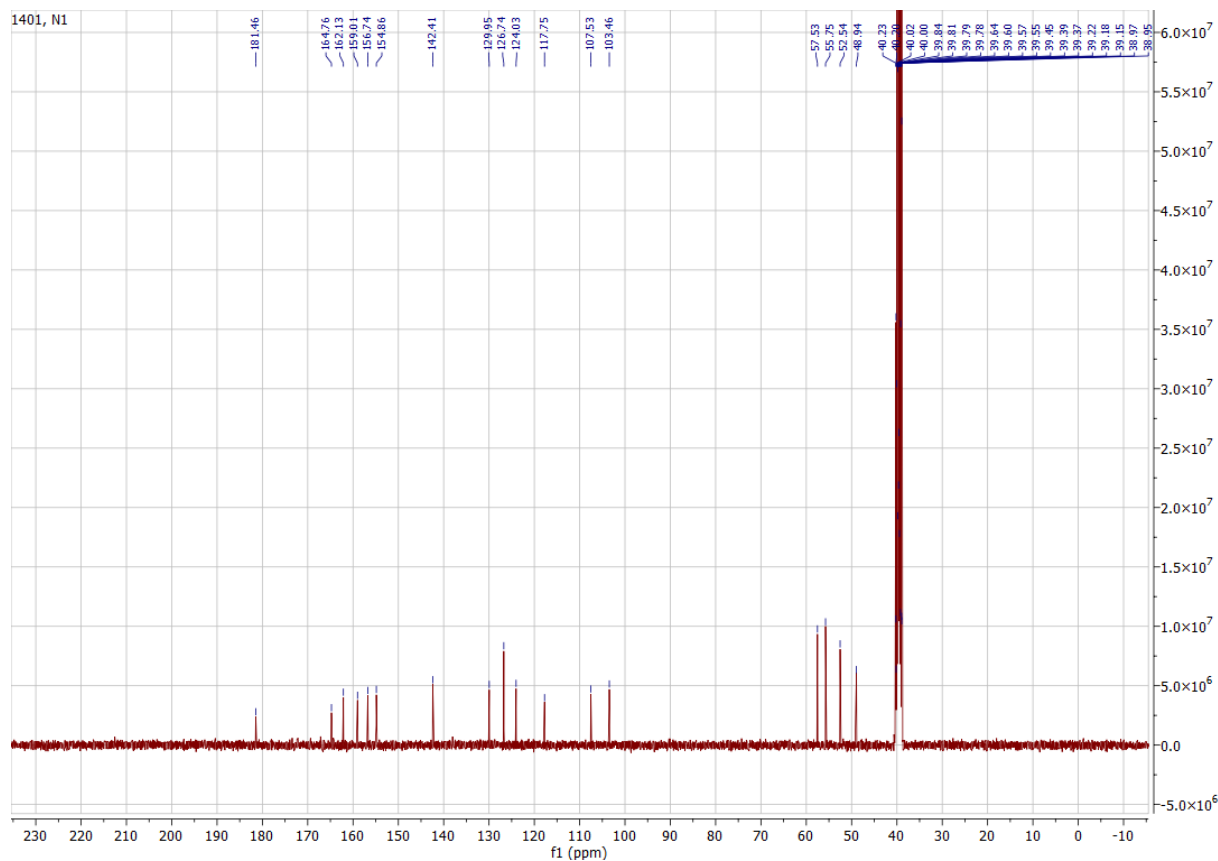

**Figure S16.** <sup>13</sup>C NMR spectrum of methyl 6'-amino-5'-cyano-5-methoxy-2-oxo-2'H-spiro[indoline-3,4'-pyrano[2,3-c]pyrazole]-3'-carboxylate (**2d**) in DMSO-d<sub>6</sub>.

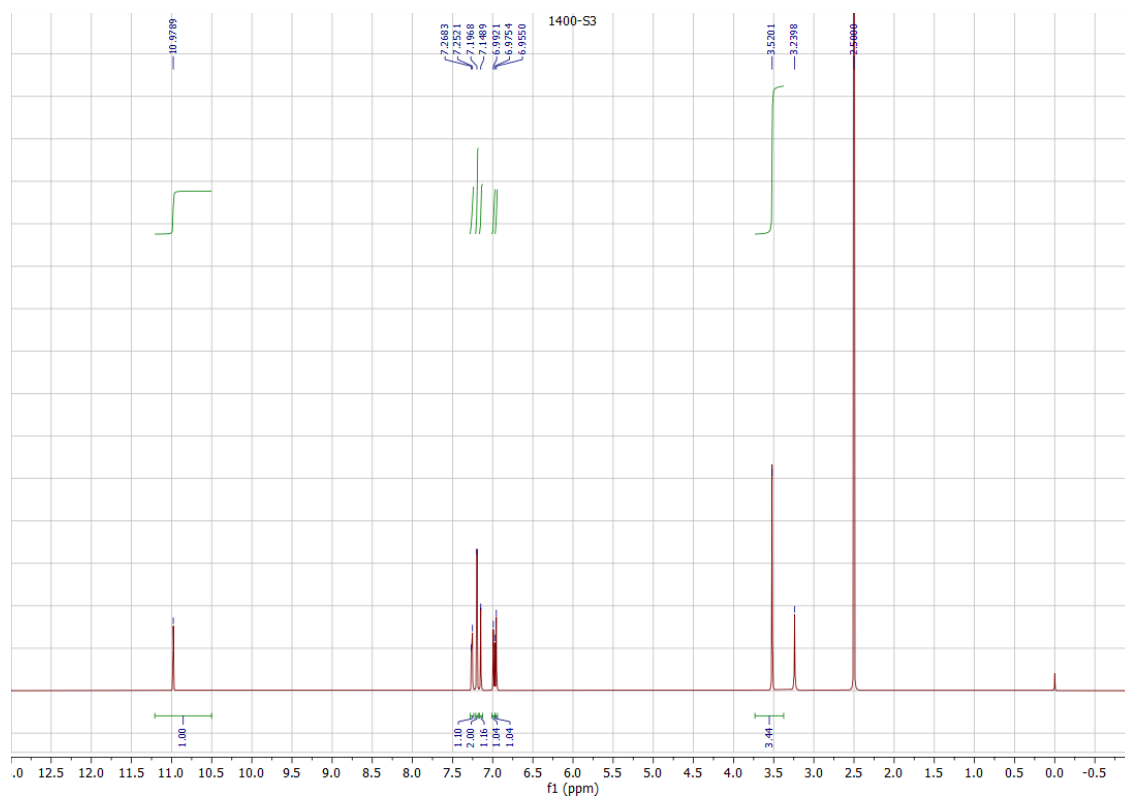

**Figure S17.** <sup>1</sup>H NMR spectrum of methyl 6'-amino-5-chloro-5'-cyano-2-oxo-2'*H*-spiro[indoline-3,4'-pyrano[2,3-*c*]pyrazole]-3'-carboxylate (**3d**) in DMSO-d<sub>6</sub>.

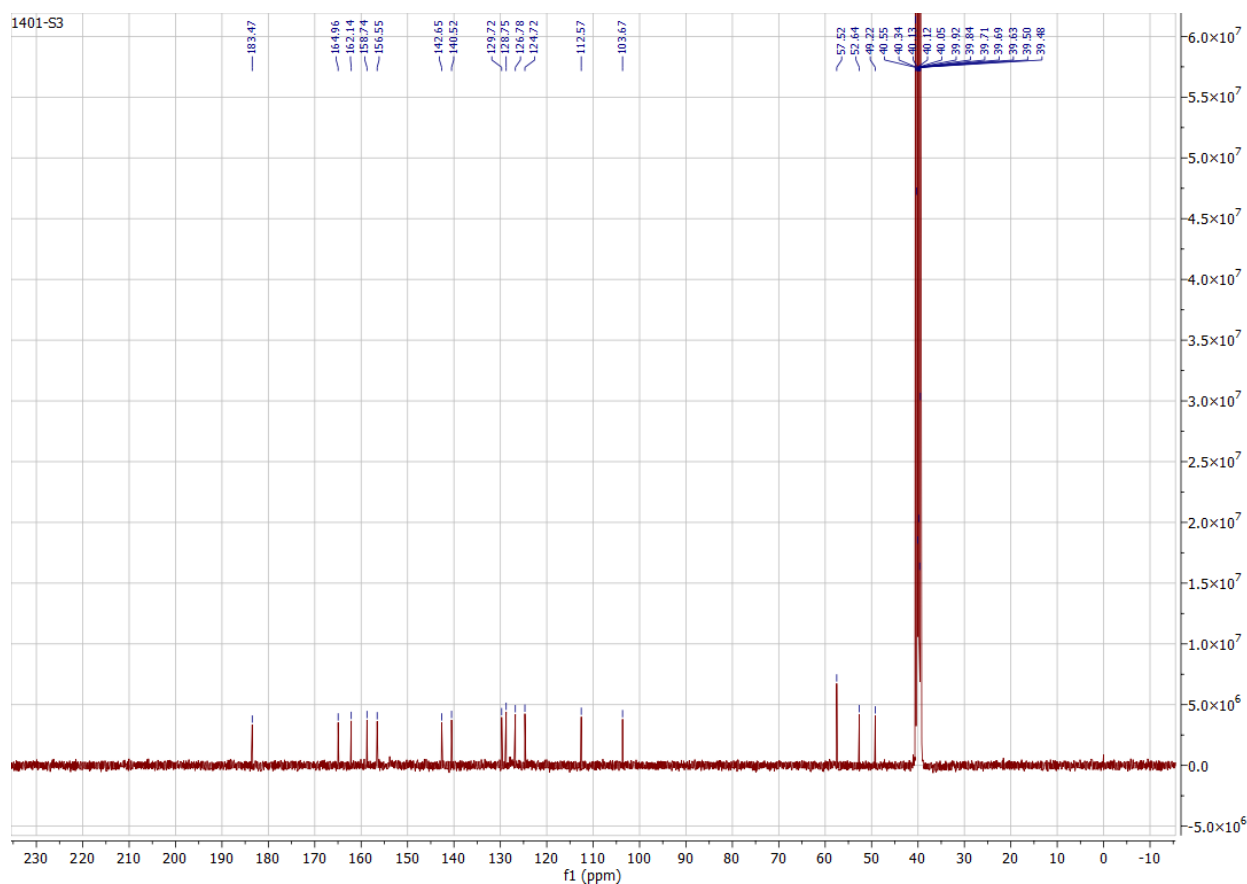

**Figure S18.** <sup>13</sup>C NMR spectrum of methyl 6'-amino-5-chloro-5'-cyano-2-oxo-2'*H*-spiro[indoline-3,4'-pyrano[2,3-*c*]pyrazole]-3'-carboxylate (**3d**) in DMSO-d<sub>6</sub>.

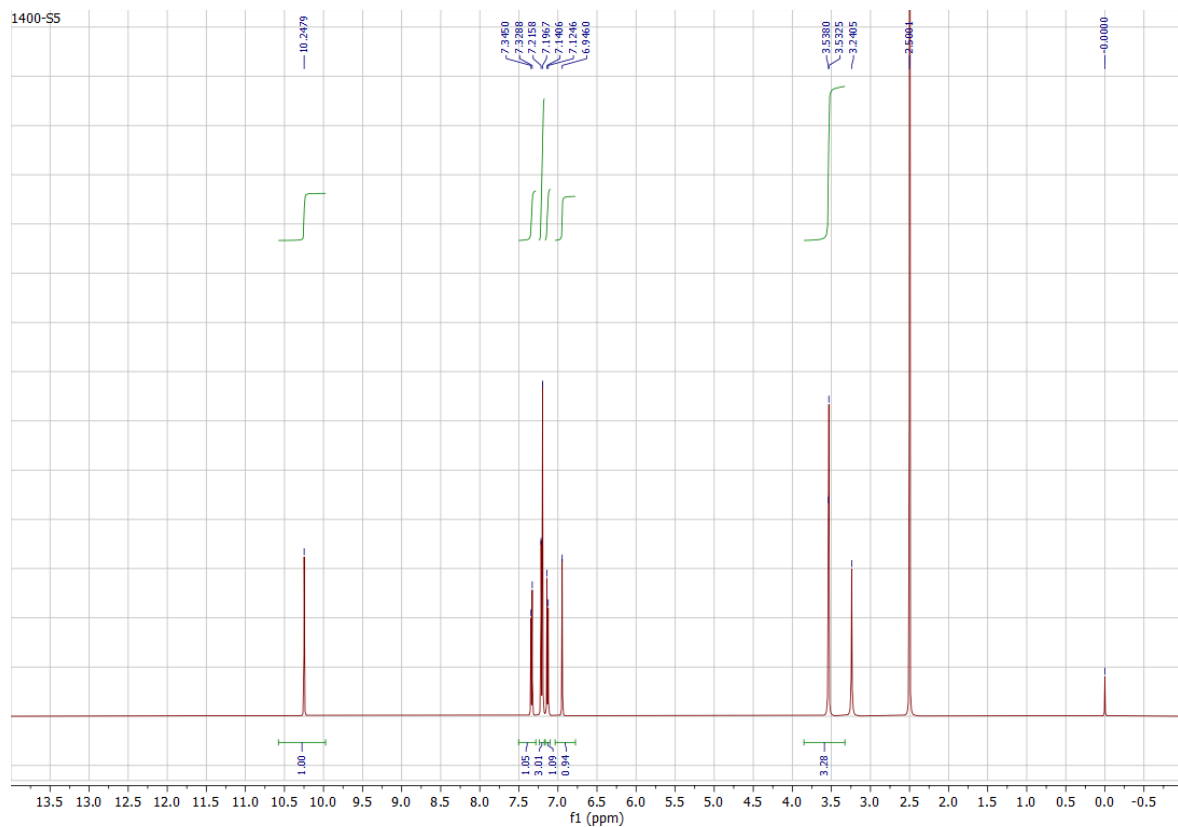

**Figure S19.** <sup>1</sup>H NMR spectrum of methyl 6'-amino-5-bromo-5'-cyano-2-oxo-2'*H*-spiro[indoline-3,4'-pyrano[2,3-*c*]pyrazole]-3'-carboxylate (**4d**) in DMSO-*d*<sub>6</sub>.

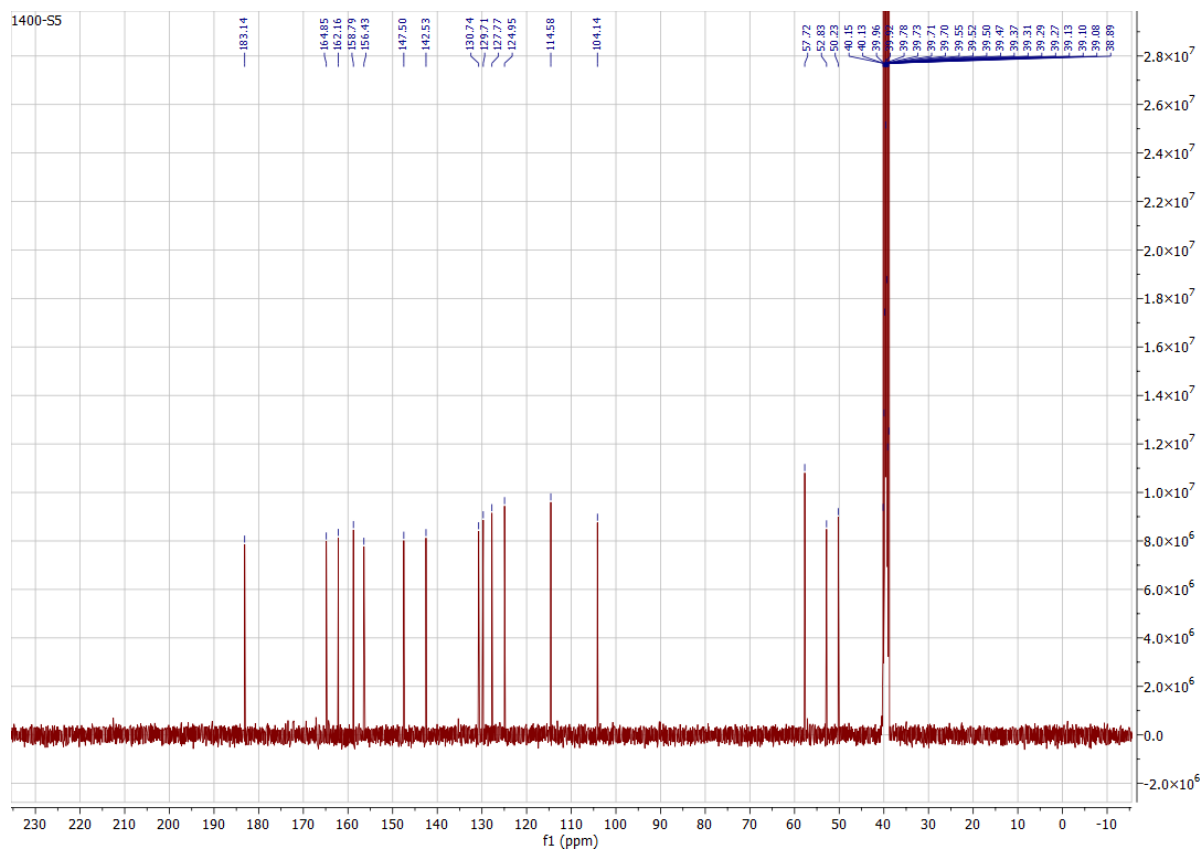

**Figure S20.** <sup>13</sup>C NMR spectrum of methyl 6'-amino-5-bromo-5'-cyano-2-oxo-2'*H*-spiro[indoline-3,4'-pyrano[2,3-*c*]pyrazole]-3'-carboxylate (**4d**) in DMSO-*d*<sub>6</sub>.

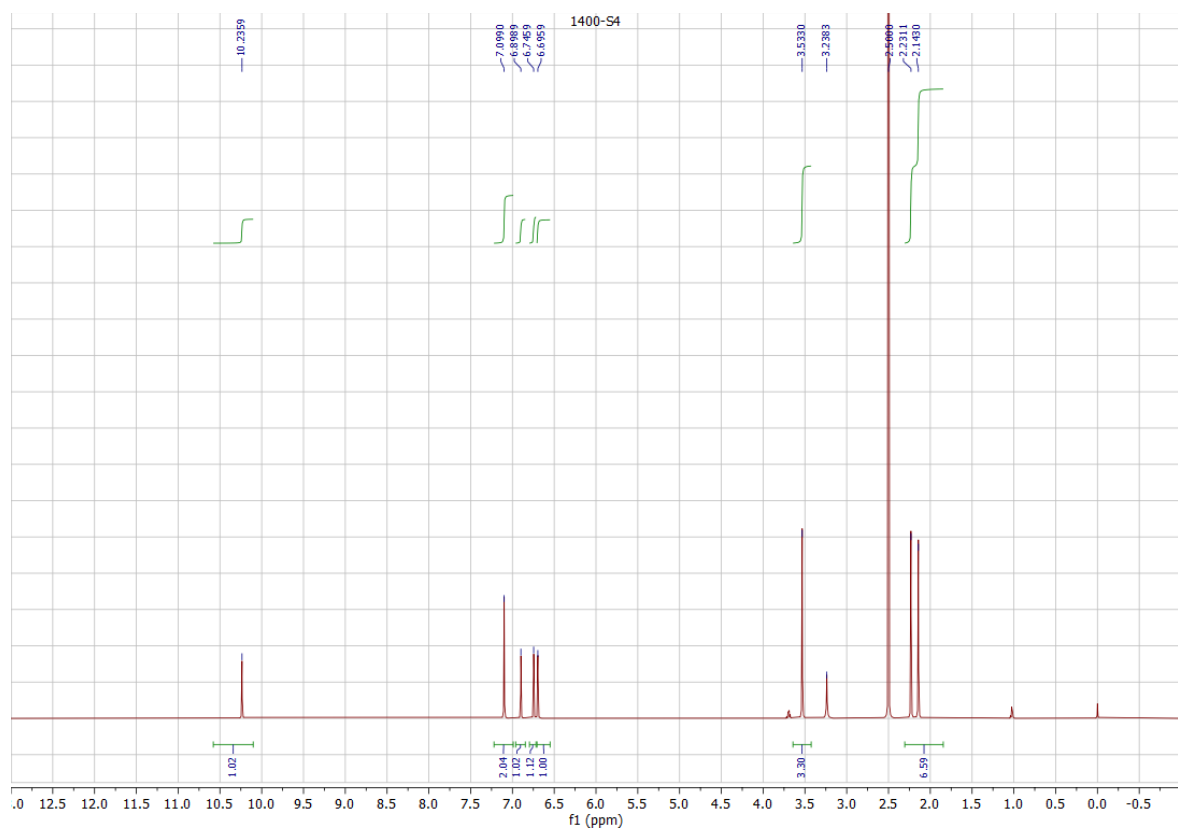

**Figure S21.** <sup>1</sup>H NMR spectrum of methyl 6'-amino-5'-cyano-5,7-dimethyl-2-oxo-2'*H*-spiro[indoline-3,4'-pyrano[2,3-*c*]pyrazole]-3'-carboxylate (**5d**) in DMSO-*d*<sub>6</sub>.

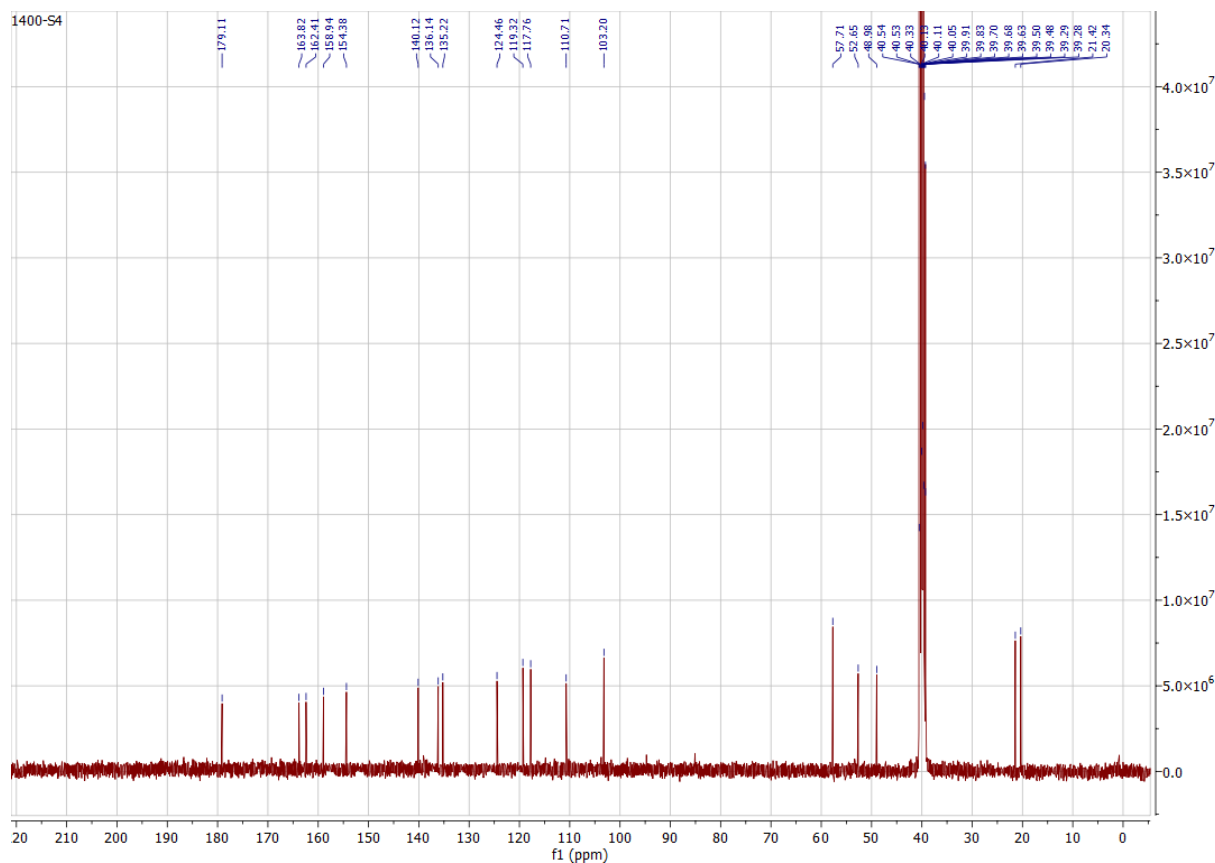

**Figure S22.** <sup>13</sup>C NMR spectrum of methyl 6'-amino-5'-cyano-5,7-dimethyl-2-oxo-2'*H*-spiro[indoline-3,4'-pyrano[2,3-*c*]pyrazole]-3'-carboxylate (**5d**) in DMSO-*d*<sub>6</sub>.

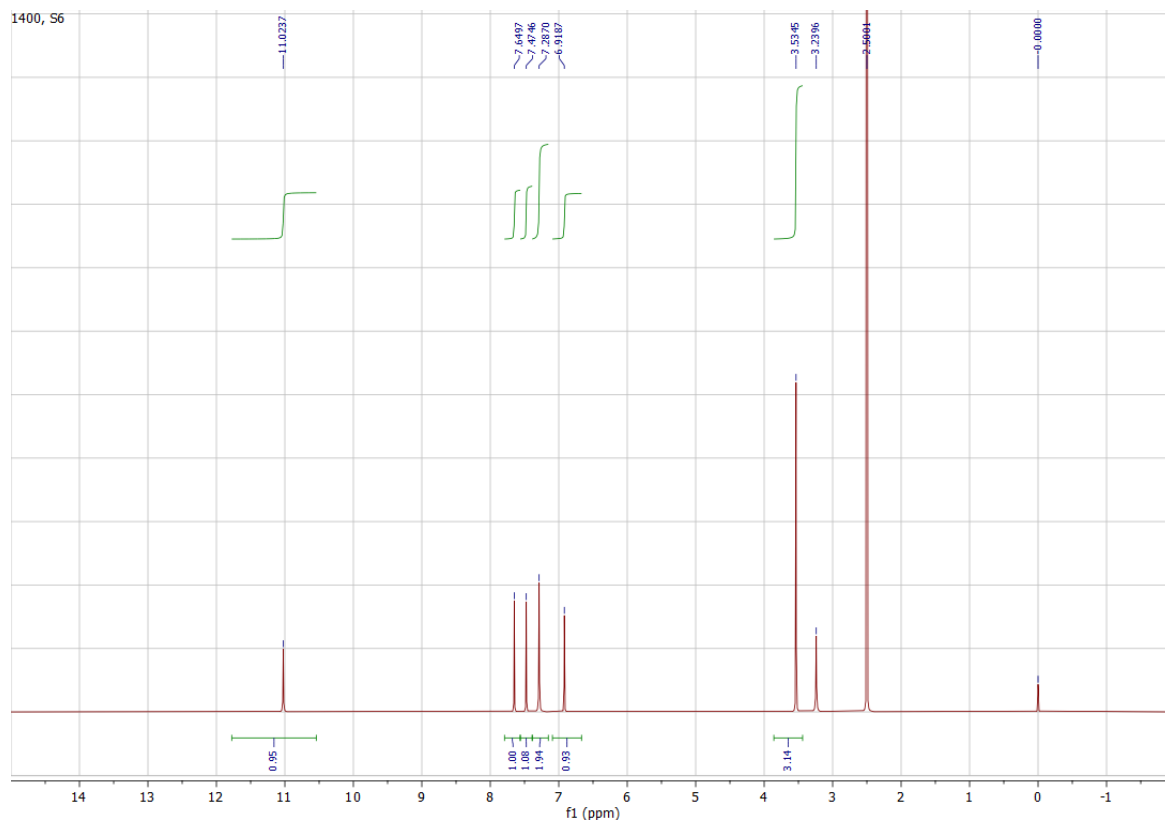

**Figure S23.** <sup>1</sup>H NMR spectrum of methyl 6'-amino-5,7-dibromo-5'-cyano-2-oxo-2'H-spiro[indoline-3,4'-pyrano[2,3-c]pyrazole]-3'-carboxylate (**6d**) in DMSO-d<sub>6</sub>.

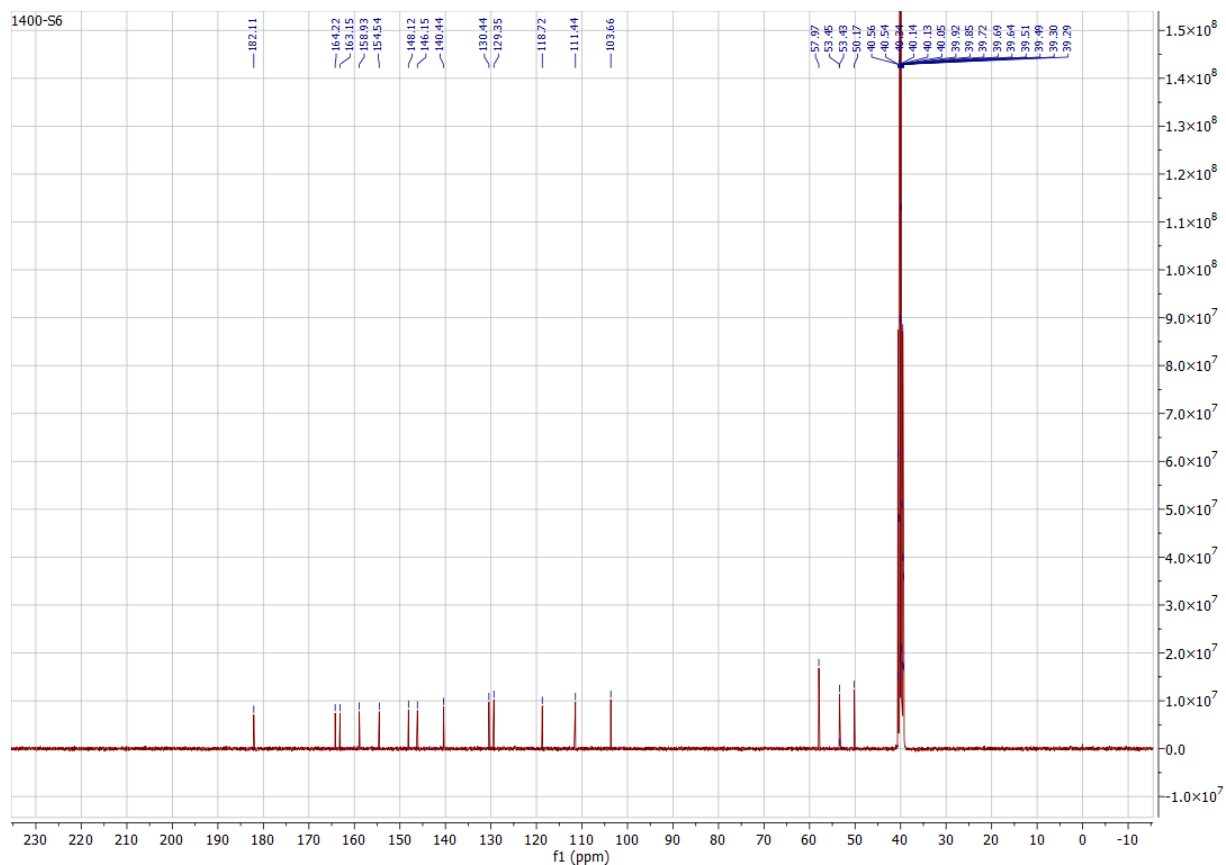

**Figure S24.** <sup>13</sup>C NMR spectrum of methyl 6'-amino-5,7-dibromo-5'-cyano-2-oxo-2'H-spiro[indoline-3,4'-pyrano[2,3-c]pyrazole]-3'-carboxylate (**6d**) in DMSO-d<sub>6</sub>.

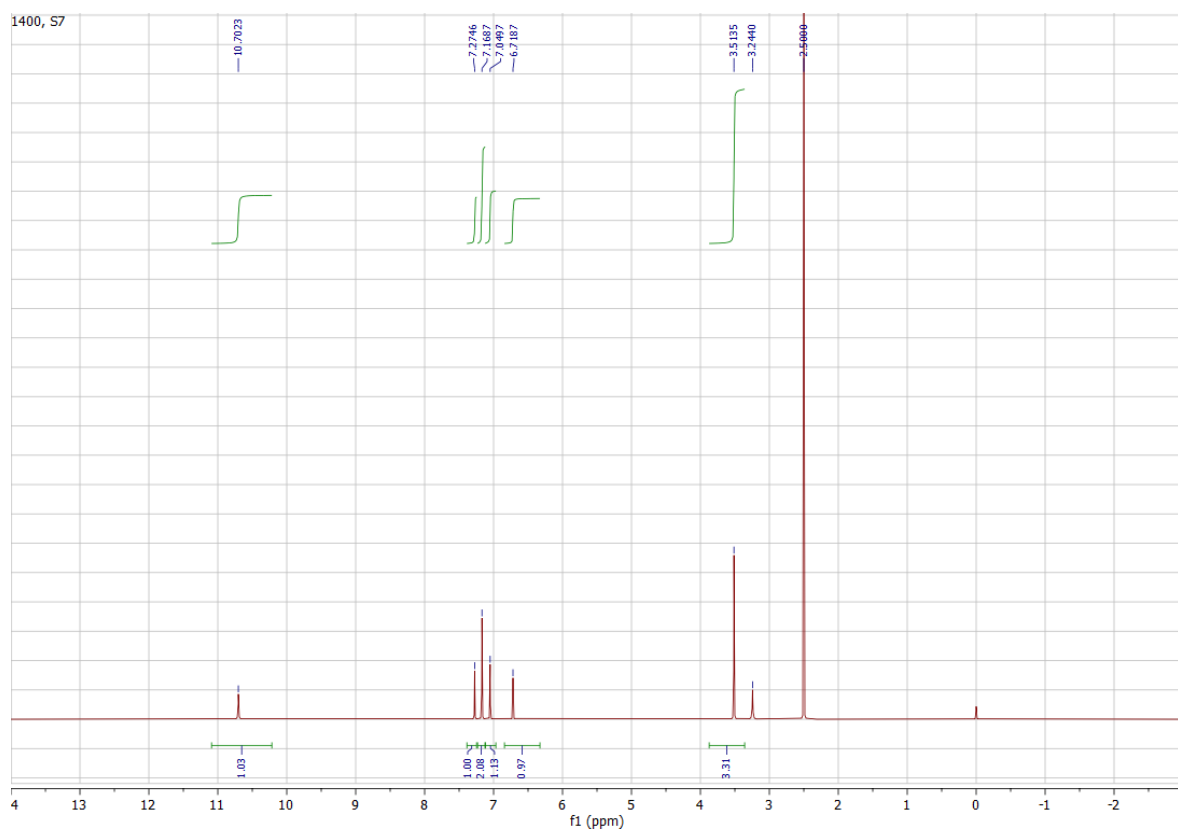

**Figure S25.** <sup>1</sup>H NMR spectrum of methyl 6'-amino-5,7-dichloro-5'-cyano-2-oxo-2'H-spiro[indoline-3,4'-pyrano[2,3-c]pyrazole]-3'-carboxylate (**7d**) in DMSO-d<sub>6</sub>.

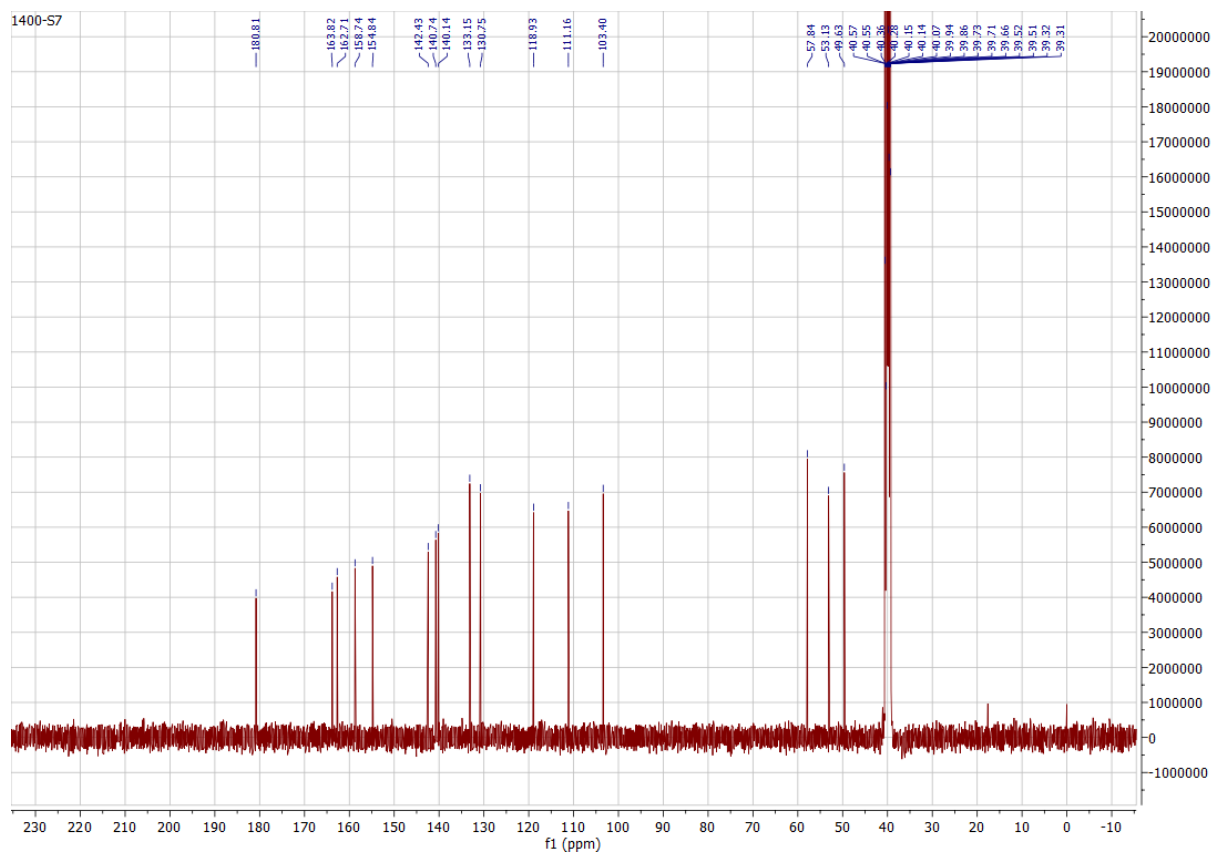

**Figure S26.** <sup>13</sup>C NMR spectrum of methyl 6'-amino-5,7-dichloro-5'-cyano-2-oxo-2'H-spiro[indoline-3,4'-pyrano[2,3-c]pyrazole]-3'-carboxylate (**7d**) in DMSO-d<sub>6</sub>.

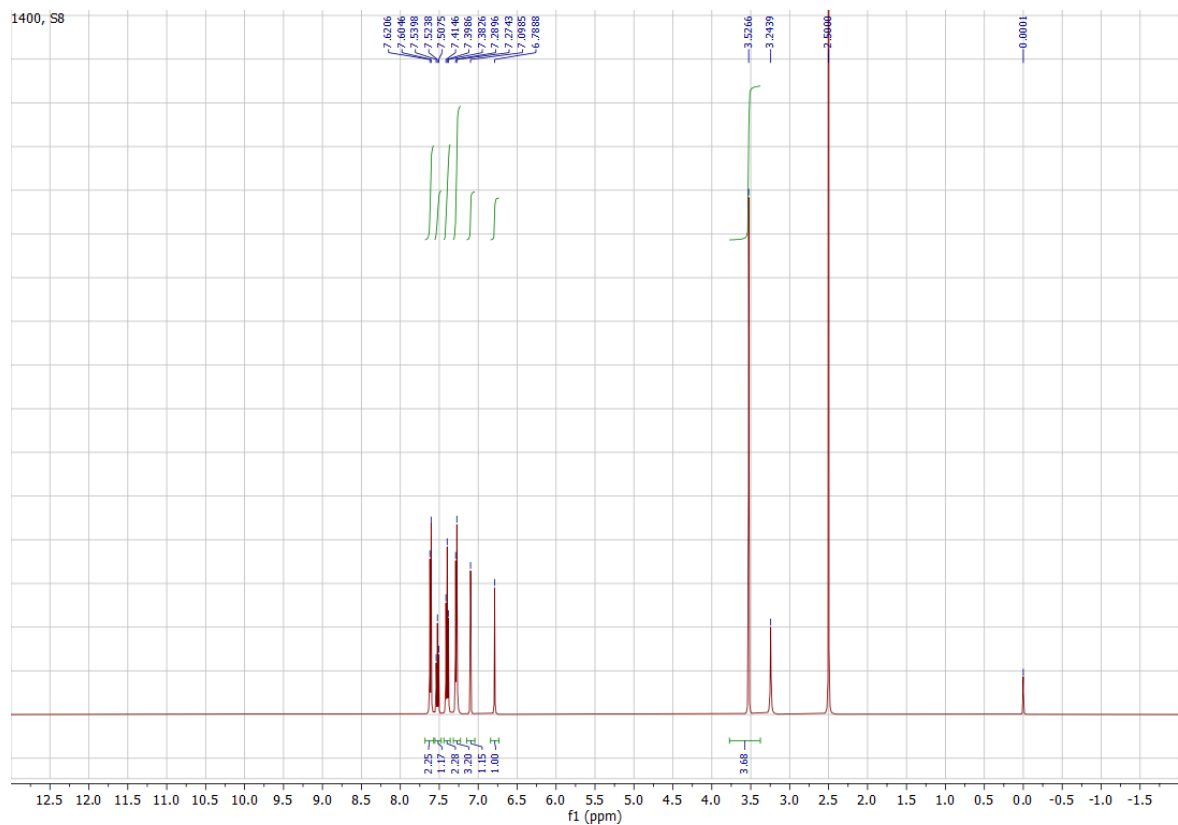

**Figure S27.** <sup>1</sup>H NMR spectrum of methyl 6'-amino-5,7-dichloro-5'-cyano-2-oxo-1-phenyl-2'*H*-spiro[indoline-3,4'-pyrano[2,3-*c*]pyrazole]-3'-carboxylate (**8d**) in DMSO-d<sub>6</sub>.

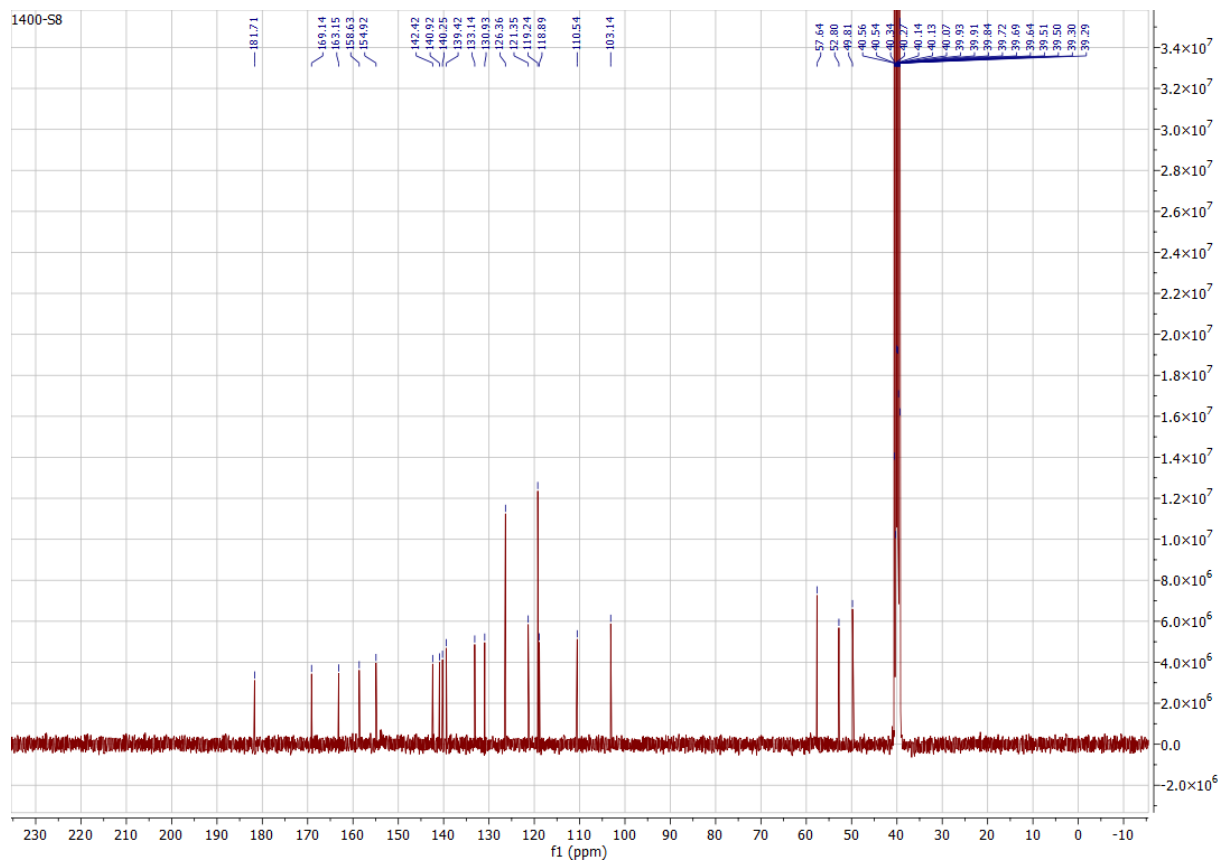

**Figure S28.** <sup>13</sup>C NMR spectrum of methyl 6'-amino-5,7-dichloro-5'-cyano-2-oxo-1-phenyl-2'*H*-spiro[indoline-3,4'-pyrano[2,3-*c*]pyrazole]-3'-carboxylate (**8d**) in DMSO-d<sub>6</sub>.
